# Supplementary material for: Molecular characterization and phylogenetic analysis of pseudorabies virus variants isolated from Guangdong province of southern China during 2013–2014
Source: PubMed Central journal article supplement — J Vet Sci. 2016 Sep 20;17(3):369–75. doi: 10.4142/jvs.2016.17.3.369 (PMC5037305; doi:10.4142/jvs.2016.17.3.369), 2016-09-20
Supplement: jvs-17-369-s001.pdf [file jvs-17-369-s001.pdf]

**Supplementary Table 1.** PRV strains isolated from Guangdong province of southern China during 2013–2014

| Isolate    | Geographic origin | Year of isolation | Sample origin | GenBank accession number |                 |                 |                 |                 |                  |                  |
|------------|-------------------|-------------------|---------------|--------------------------|-----------------|-----------------|-----------------|-----------------|------------------|------------------|
|            |                   |                   |               | <i>US2 (28K)</i>         | <i>US3 (PK)</i> | <i>US6 (gD)</i> | <i>US7 (gl)</i> | <i>US8 (gE)</i> | <i>US9 (11K)</i> | <i>UL23 (TK)</i> |
| GD-1-2013  | Guangdong         | 2013              | Brain         | KR051941                 | KR051985        | KR051951        | KR051974        | KR051962        | KR051931         | KR051994         |
| GD-2-2013  | Guangdong         | 2013              | Brain         | KR051950                 | KR051984        | KR051961        | KR051973        | KR051972        | KR051940         | KR052004         |
| GD-3-2013  | Guangdong         | 2013              | Brain         | KR051949                 | KR051993        | KR051960        | KR051983        | KR051971        | KR051939         | KR052003         |
| GD-4-2013  | Guangdong         | 2013              | Brain         | KR051948                 | KR051992        | KR051959        | KR051982        | KR051970        | KR051938         | KR052002         |
| GD-5-2014  | Guangdong         | 2014              | Brain         | KR051947                 | KR051991        | KR051958        | KR051981        | KR051969        | KR051937         | KR052001         |
| GD-6-2014  | Guangdong         | 2014              | Brain         | KR051946                 | KR051990        | KR051957        | KR051980        | KR051968        | KR051936         | KR052000         |
| GD-7-2014  | Guangdong         | 2014              | Brain         | KR051945                 | KR051989        | KR051956        | KR051979        | KR051967        | KR051935         | KR051999         |
| GD-8-2014  | Guangdong         | 2014              | Lung          | KR051944                 | KR051988        | KR051955        | KR051978        | KR051966        | KR051934         | KR051998         |
| GD-9-2014  | Guangdong         | 2014              | Tonsil        | KR051943                 | KR051987        | KR051954        | KR051977        | KR051965        | KR051933         | KR051997         |
| GD-10-2014 | Guangdong         | 2014              | Nose swab     | KR051942                 | KR051986        | KR051953        | KR051976        | KR051964        | KR051932         | KR051996         |
| GD-11-2014 | Guangdong         | 2014              | Brain         | ND                       | ND              | KR051952        | KR051975        | KR051963        | ND               | KR051995         |

ND, not done.
