# Supplementary material for: Molecular characterization and phylogenetic analysis of pseudorabies virus variants isolated from Guangdong province of southern China during 2013–2014
Source: PubMed Central journal article supplement — J Vet Sci. 2016 Sep 20;17(3):369–75. doi: 10.4142/jvs.2016.17.3.369 (PMC5037305; doi:10.4142/jvs.2016.17.3.369), 2016-09-20
Supplement: jvs-17-369-s002.pdf [file jvs-17-369-s002.pdf]

**Supplementary Table 2.** Reference strains used in this work

| Strain     | Country     | Year of isolation | GenBank accession number |            |            |            |            |            |            |
|------------|-------------|-------------------|--------------------------|------------|------------|------------|------------|------------|------------|
|            |             |                   | US2 (28K)                | US3 (PK)   | US6 (gD)   | US7 (gI)   | US8 (gE)   | US9 (11K)  | UL23 (TK)  |
| SC         | China       | 1987              | -                        | -          | -          | KM676289.1 | KM676290.1 | KM676290.1 | -          |
| Fa         | China       | 1989              | -                        | EU263614.1 | AY196984.1 | -          | -          | -          | -          |
| Ea         | China       | 1992              | AF251221.1               | AY319929.1 | AF086702.1 | AF306511.1 | AF171937.1 | AF251220.1 | AF080571.1 |
| Min-A      | China       | 1996              | -                        | -          | AY169694.1 | -          | AY170318.1 | -          | AY171242.1 |
| SH         | China       | 1999              | -                        | -          | -          | -          | AF207700.1 | -          | AF199413.1 |
| LA         | China       | 2002              | -                        | -          | AY174090.1 | -          | AY173124.1 | -          | AY173125.1 |
| PRV-FZ     | China       | 2007              | -                        | -          | FJ477296.1 | -          | -          | -          | -          |
| GDSH       | China       | 2007              | -                        | -          | -          | -          | EF552427.1 | -          | -          |
| HBVD       | China       | 2008              | -                        | -          | -          | -          | -          | -          | KJ526457.1 |
| HS         | China       | 2008              | -                        | EU650374.1 | -          | -          | -          | -          | -          |
| SCZ        | China       | 2008              | -                        | EU650375.1 | -          | -          | -          | -          | -          |
| SDCX2011   | China       | 2011              | -                        | -          | -          | -          | -          | -          | KF381397.1 |
| Guizhou-DY | China       | 2012              | -                        | -          | -          | -          | JX417716.1 | -          | -          |
| BJ/YT      | China       | 2012              | -                        | KC981239.1 | KC981239.1 | KC981239.1 | KC981239.1 | KC981239.1 | KC981239.1 |
| HeN1       | China       | 2012              | KP098534.1               | KP098534.1 | KP098534.1 | KP098534.1 | KP098534.1 | KP098534.1 | KP098534.1 |
| HB/BD      | China       | 2012              | -                        | -          | -          | -          | KC415026.1 | -          | -          |
| HB/LF      | China       | 2012              | -                        | -          | -          | -          | KC415029.1 | -          | -          |
| MZ1        | China       | 2012              | -                        | -          | -          | -          | KF130881.1 | -          | -          |
| TJ         | China       | 2012              | KJ789182.1               | KJ789182.1 | KJ789182.1 | KJ789182.1 | KJ789182.1 | KJ789182.1 | KJ789182.1 |
| Xiang A    | China       | 2012              | -                        | KF711990.1 | -          | KF711987.1 | KJ463839.1 | -          | KF711991.1 |
| ZJ01       | China       | 2012              | KM061380.1               | KM061380.1 | KM061380.1 | KM061380.1 | KM061380.1 | KM061380.1 | KM061380.1 |
| BJ/RD      | China       | 2013              | -                        | -          | KF017274.1 | -          | KF017275.1 | -          | -          |
| PYQF2013   | China       | 2013              | -                        | -          | -          | -          | -          | -          | KF381396.1 |
| QBA        | China       | 2013              | -                        | -          | KF017337.1 | -          | KF017333.1 | -          | KF017341.1 |
| QXX        | China       | 2013              | -                        | -          | KF017336.1 | -          | -          | -          | -          |
| YY         | China       | 2013              | -                        | KP259822.1 | -          | KP259819.1 | KF130885.1 | -          | KP259815.1 |
| LY         | China       | 2014              | -                        | KP259816.1 | -          | KP259827.1 | -          | -          | KP259824.1 |
| NS374      | Belgium     | 1971              | -                        | -          | -          | FJ605140.1 | FJ605135.1 | -          | -          |
| 00V72      | Belgium     | 2000              | -                        | -          | -          | FJ605137.1 | FJ605132.1 | -          | -          |
| 75V19      | Belgium     | 1975              | -                        | -          | -          | FJ605139.1 | FJ605133.1 | -          | -          |
| 89V87      | Belgium     | 1989              | -                        | -          | -          | FJ605138.1 | FJ605134.1 | -          | -          |
| Bartha     | Hungary     | 1961              | -                        | JF797217.1 | JF797217.1 | -          | -          | -          | JF797217.1 |
| Kaplan     | Hungary     | 1959              | KJ717942.1               | KJ717942.1 | KJ717942.1 | KJ717942.1 | KJ717942.1 | KJ717942.1 | KJ717942.1 |
| Nia-1      | Ireland     | 1962              | -                        | -          | -          | FJ605141.1 | FJ605136.1 | -          | -          |
| P-PrV      | Malaysia    | 2008              | -                        | -          | -          | -          | FJ176390.1 | -          | -          |
| Namyangju  | South Korea | 1987              | -                        | -          | GQ325660.1 | -          | -          | -          | -          |
| Yangsang   | South Korea | 1996              | AY249861.1               | -          | AY217094.1 | -          | AY249861.1 | AY249861.1 | AY217095.1 |
| NiA3       | Spain       | 1971              | D10452.1                 | D10451.1   | -          | -          | EU502923.1 | -          | X55001.1   |
| Rice       | USA         | 1975              | -                        | -          | -          | M14336.1   | -          | M16769.1   | -          |
| Becker     | USA         | 1967              | JF797219.1               | JF797219.1 | JF797219.1 | JF797219.1 | JF797219.1 | JF797219.1 | JF797219.1 |

-, not available in GenBank or not used in this study.
